# Supplementary material
Source: publisher site journal article supplement (http://kjim.org/upload/media/kjim-2021-021-suppl5.pdf)
Supplement: Supplementary file 1 [file kjim-2021-021-suppl5.pdf]

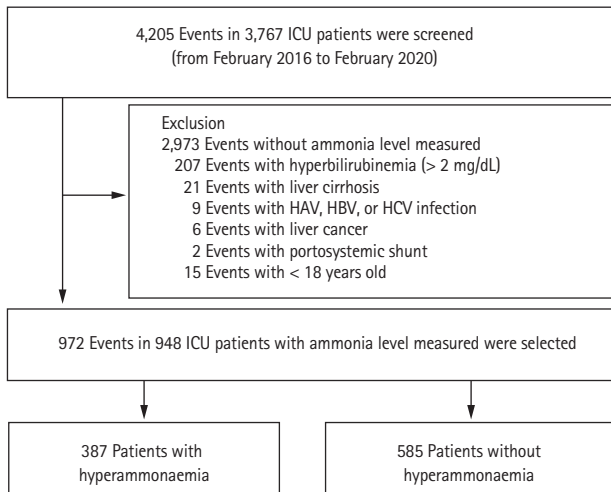

**Supplementary Figure 1.** Patient recruitment flow chart. ICU, intensive care unit; HAV, hepatitis A virus; HBV, hepatitis B virus; HCV, hepatitis C virus.
